## EFFECTS OF DIET ON RESPONSES TO HYPOXIA IN STURGEON (*ACIPENSER NACCARI*)

BY D. J. RANDALL<sup>1</sup>, D. J. MCKENZIE<sup>2</sup>, G. ABRAMI<sup>2</sup>,  
G. P. BONDILOTTI<sup>3</sup>, F. NATIELLO<sup>2</sup>, P. BRONZI<sup>4</sup>, L. BOLIS<sup>2</sup>  
AND E. AGRADI<sup>2</sup>

<sup>1</sup>*Department of Zoology, 6270 University Boulevard, University of British Columbia, Vancouver, BC, Canada,* <sup>2</sup>*Institute of Pharmacological Sciences, via Balzaretti 9, University of Milan, 20133 Milan, Italy,* <sup>3</sup>*Department of Pharmacology, via Vanvitelli 32, University of Milan, 20133 Milan, Italy,* and <sup>4</sup>*ENEL Centro Ricerca Termica e Nucleare, via Monfalcone 15, 20132 Milan, Italy*

*Accepted 25 May 1992*

### Summary

We investigated the effects of a diet enriched in omega-3 ( $\omega$ 3) polyunsaturated fatty acids (PUFA) and vitamin E on responses of sturgeon (*Acipenser naccarii*) to hypoxia. After 3 months of feeding, there were significant increases in  $\omega$ 3 PUFA in liver and muscle, and of vitamin E in muscle, of fish fed the enriched diet (ED) compared with fish on a standard diet (SD), indicating that tissue composition is influenced by diet. Acute exposure to hypoxia (10 min at 10.8 kPa water O<sub>2</sub> tension,  $P_{wO_2}$ ) had no effect on oxygen consumption ( $\dot{V}_{O_2}$ ), increased gill ventilation frequency ( $f_G$ ) and reduced arterial blood O<sub>2</sub> content ( $Ca_{O_2}$ ) in both dietary groups, but ED sturgeon exhibited a significantly smaller decrease in  $Ca_{O_2}$  than did SD animals. Progressive hypoxic exposure ( $P_{wO_2}$  decreasing gradually from 20.5 to 3.6 kPa within 45–60 min) led to a significant increase in  $\dot{V}_{O_2}$  at intermediate levels of  $P_{wO_2}$  in SD sturgeon that was not seen in ED animals. Furthermore, ED sturgeon showed no significant reduction in arterial plasma pH (pHa) and  $Ca_{O_2}$  at  $P_{wO_2}$  levels that caused significant reductions in these variables in SD sturgeon. ED sturgeon exhibited a smaller increase in plasma lactate level than did SD fish. We suggest that PUFA and/or vitamin E contribute significantly to regulation of metabolism in hypoxia.

### Introduction

Although species differences are important factors in determining the characteristics of stress responses in animals, the nutritional status of the animal also plays a primary role (Parke and Ioannides, 1981; Vergroesen and Crawford, 1989; Packer,

**Key words:** *Acipenser naccarii*, fish, hypoxia, oxygen consumption, polyunsaturated fatty acids, sturgeon, vitamin E.

1991). Indeed, the nutritional status of laboratory animals may account for differences in responses to stress when comparing data from different studies.

Increases in the relative amount of  $\omega 3$  polyunsaturated fatty acids (PUFA) in the diet are reported to protect against the effects of oxidative stress, decreasing the likelihood of chronic degenerative cardiovascular disease in humans and increasing the resistance of the mammalian heart and brain to ischaemic damage (see Hornstra, 1989, for a review). Vitamin E, a lipid-soluble anti-oxidant, is also reported to protect against cardiovascular disease and ischaemic damage (Crary and McCarty, 1984; Budowski and Sklan, 1989; Downey, 1990; Packer, 1991). Thus, there is evidence to suggest that variations in the quality of the diet, particularly the  $\omega 3$  fatty acid and vitamin E content, may lead to changes in whole-animal responses to hypoxic stress.

Because fish health and physiological processes are strongly dependent on dietary  $\omega 3$  fatty acid and anti-oxidant status (Ackman, 1980; Bell *et al.* 1986; Cowey, 1986; Raynard *et al.* 1991), we investigated the effects of a combined pretreatment with dietary  $\omega 3$  PUFA and vitamin E on the responses of Cobice sturgeon (*Acipenser naccarii*) to hypoxia. Dietary composition is shown to have a marked effect on the regulation of metabolism during hypoxia.

## Materials and methods

### *Animals*

Cobice sturgeon, *Acipenser naccarii* (Bonaparte), were maintained at *La Casella* experimental thermal fish farm [Via Argine del Ballottino, 29010, Sarmato (PC), Italy] in large fibreglass tanks with a continuous water supply (25°C, pH 7.9).

### *Diets*

Groups of 30 sturgeon in separate tanks were maintained on two different diets. Standard-diet animals (SD sturgeon) were fed a commercial sturgeon feed (Alma Storioni, Agros, Bolzano, Italy) with ascorbic acid and lecithin supplements, as pellets. Experimental-diet animals (ED sturgeon) were fed pellets of the same feed but with additional fish oil and vitamin E supplements. Feeds were pelleted freshly every 2–3 days and stored at 4°C. The two diets had the composition reported in Table 1. Following 90 days of feeding to satiation, samples of liver and

Table 1. *Composition of control and experimental diets*

|                                             | Control | Experimental |
|---------------------------------------------|---------|--------------|
| Total lipids (g kg <sup>-1</sup> )          | 120     | 200          |
| $\omega 3$ fatty acid (g kg <sup>-1</sup> ) | 26      | 48           |
| $\omega 6$ fatty acid (g kg <sup>-1</sup> ) | 11      | 12           |
| Arachidonic acid (g kg <sup>-1</sup> )      | 0       | 0            |
| Eicosapentaenoic acid (g kg <sup>-1</sup> ) | 9.0     | 26.8         |
| Vitamin E (g kg <sup>-1</sup> )             | 0.056   | 0.556        |

muscle were obtained from five freshly killed fish from each group and immediately frozen on dry ice for subsequent analysis of fatty acid and vitamin E content. Lipids were extracted from 1 g of a homogenate of the whole liver or half of the myotome muscle mass with chloroform:methanol (2:1 v/v), as described by Folch *et al.* (1957), with 5 mg l<sup>-1</sup> butylated hydroxytoluene as an anti-oxidant. Total fatty acid levels were measured by gas chromatography using a Dani gas chromatograph with a programmable temperature vapouriser injector and a column (Supelcowax 30 m, 0.30 mm inner diameter, 0.27 µm film thickness) with temperature programming (150–220°C at 2.5° min<sup>-1</sup> increments). Vitamin E was extracted from 1 g of the homogenate from each tissue, as described by Weber (1987). Vitamin E was measured by HPLC with fluorescence detection (Jasco 880 intelligent pump; Speri-5 C18 reverse-phase column and Jasco 821 FP intelligent detector) with a methanol mobile phase, as described by Weber (1987). Fatty acid and vitamin E levels in the two tissues were expressed as absolute amounts per 100 g tissue.

Following 150 days of feeding to satiation with the diets, responses to two hypoxic challenges were measured in nine SD animals (mean mass ± s.e. = 783.8 ± 40.49 g) and six ED animals (mean mass ± s.e. = 867.8 ± 71.7 g).

#### *Surgical procedures*

Sturgeon were anaesthetised in a 1:10 000 buffered solution of tricainemethanesulphonate (MS 222) and then transferred to a surgical table and artificially ventilated with an MS 222 solution at 1:20 000. A dorsal aortic cannula (PE 50, Intramedic) was implanted using the technique of Soivio *et al.* (1972). Animals were allowed to recover for 24–48 h in a Plexiglas respirometer chamber (10 l volume) with a continuous water supply. The chamber was darkened on all sides except for a small space on the upper surface, which permitted video recording of ventilation frequency (see below). The cannula was flushed with heparinised Cortland's saline (Wolf, 1963) every 24 h.

#### *Measurement of respiratory and blood variables*

Water flow through the Plexiglas chamber could be stopped by two three-way valves which caused the water to be recirculated through an external loop with an Eheim model 1034 pump (Eheim, Germany). A Yellow Springs O<sub>2</sub> electrode (model YSI 5331) placed at the outflow of the chamber and attached to an Amel 321 O<sub>2</sub>-meter (Amel, Italy) monitored the decline in water O<sub>2</sub> levels during the period of recirculation, with data registered on a Philips PM 8252 potentiometric recorder. This subsequently allowed calculation of O<sub>2</sub> consumption ( $\dot{V}_{O_2}$ , as mg O<sub>2</sub> kg<sup>-1</sup> h<sup>-1</sup>) from the volume of the recirculating system and the mass and volume of the fish. Gill ventilation frequency (*f<sub>G</sub>*, as beats min<sup>-1</sup>) was recorded by a Sony video recorder placed above the respirometer chamber. Blood samples could be withdrawn anaerobically from the dorsal aortic cannula (which passed through an airtight hole in the respirometer). Arterial plasma pH (pHa) was measured using an IL System-1302 pH-blood gas analyser (Instrumentation Laboratories) regulated at 37°C. Whole blood samples were centrifuged in sealed

0.3 ml plastic micro-test-tubes containing no air within 2 min of collection. Plasma pH at 25°C was then calculated using a pH:temperature coefficient of 0.013 pH units per degree, as given for rainbow trout plasma by Heisler (1984). Although the absolute values for pHa obtained by this method may not be reliable, because all samples were treated identically comparisons between samples were valid. Arterial blood O<sub>2</sub> content (CaO<sub>2</sub>) was measured using the technique of Tucker (1967) and an Instrumentation Laboratories P<sub>O<sub>2</sub></sub> electrode (model 68653) regulated at 37°C. Sturgeon in the ED group had a slightly higher mean mass than sturgeon in the SD group and, presumably, larger blood volumes. Arterial blood O<sub>2</sub> content measurements in both groups were corrected for blood volume loss as a result of sampling, assuming a blood volume of 5% body volume, in order to correct for apparent differences in CaO<sub>2</sub> between the groups that might have resulted from the sampling regime. Plasma from centrifuged blood samples was frozen in liquid N<sub>2</sub> within 1 min of collection for subsequent measurement of plasma circulating catecholamine and lactate levels. Plasma catecholamines were measured on alumina-extracted samples using HPLC with electrochemical detection, with a mobile phase consisting of: 0.08 mol l<sup>-1</sup> citric acid, 0.04 mol l<sup>-1</sup> Na<sub>2</sub>HPO<sub>4</sub>, 0.1 mmol l<sup>-1</sup> sodium EDTA, 0.64 mmol l<sup>-1</sup> sodium octyl sulphate, 10% (v/v) methanol, at pH 3.2, a Shimadzu LC6A solvent delivery pump, a Shimadzu SIL 6B/9A sample injector, a Nucleosil C<sub>18</sub> RP 7 μm particle size reverse-phase column (Macherey-Nagel, Germany), a Coulochem 5100A electrochemical detector (Environmental Science Associates, USA) and a Shimadzu C-R4A integrator, according to the method of Bondiolotti *et al.* (1987). Plasma lactate was measured using a Sigma ultraviolet colorimetric assay.

#### *Protocol*

All experiments were conducted at *La Casella* experimental fish farm. Sturgeon from both dietary groups were exposed to two different hypoxic challenges.

#### *Acute hypoxic exposure*

Control measurements of  $\dot{V}_{O_2}$  and  $fg$  were made under normoxic conditions ( $Pw_{O_2}=20.5$  kPa), during a 10 min recirculation period. A 1.4 ml blood sample was withdrawn (and replaced with an equal volume of heparinised saline) for measurement of normoxic pHa, CaO<sub>2</sub> and plasma catecholamine titre. The respirometer system was then flushed with hypoxic water until the water was approximately half saturated with oxygen ( $Pw_{O_2}=10.8\pm 0.3$  kPa). Water was then recirculated for 10 min to allow measurement of  $\dot{V}_{O_2}$  and  $fg$  under hypoxic conditions. A further 1.4 ml blood sample was withdrawn at the end of the hypoxic exposure period for measurement of pHa, CaO<sub>2</sub> and catecholamines. Normoxic water flow through the system was then resumed, and the animal was allowed 1–1.5 h to recover.

#### *Progressive hypoxic exposure*

Following recovery from acute hypoxia, a 1.4 ml blood sample was withdrawn

for measurement of pHa, CaO<sub>2</sub> and plasma lactate levels. Water was then recirculated so that the sturgeon created a gradual progressive hypoxia within the respirometer as it consumed the oxygen. Thus,  $\dot{V}_{O_2}$  and  $f_{\dot{G}}$  were measured as  $Pw_{O_2}$  decreased to 3.6 kPa. The duration of progressive hypoxia was between 45 and 60 min. Blood samples (0.4 ml) were withdrawn at 15.7, 9.7 and 6.0 kPa  $Pw_{O_2}$  and pHa and CaO<sub>2</sub> were measured. At 3.6 kPa, a 1.4 ml blood sample was withdrawn for measurement of pHa, CaO<sub>2</sub> and plasma lactate levels. Normoxic water flow through the respirometer was then resumed for 10 min, after which it was recirculated again for measurement of  $\dot{V}_{O_2}$  and  $f_{\dot{G}}$  during 10 min of recovery in normoxia. Following this, normoxic flow was again resumed.

#### Data analysis

Levels of PUFA and vitamin E in liver and muscle of SD and ED sturgeon groups were compared using unpaired *t*-tests. Respiratory and internal variables measured during normoxia were compared with those in acute hypoxia using a paired *t*-test. During gradual hypoxia, variables under normoxic conditions were compared with measurements taken at each level of hypoxia or during recovery using a paired *t*-test. Variables measured at a given  $Pw_{O_2}$  in fish fed the standard diet were compared with those measured in animals fed the experimental diet using unpaired *t*-tests. Differences with  $P < 0.05$  were considered statistically significant.

#### Results

Following 90 days of feeding to satiation, there were significant differences in tissue fatty acid composition and vitamin E content between the two dietary groups. ED sturgeon had significantly more total  $\omega 3$  PUFA in liver and muscle than did SD fish, and they also had significantly higher  $\omega 6$  fatty acid levels in their livers (Table 2). Despite this accumulation of  $\omega 6$  fatty acids in the liver, both the  $\omega 3/\omega 6$  and eicosapentaenoic acid/arachidonic acid ratios were significantly higher

Table 2. Liver and muscle mean fatty acid and vitamin E concentrations and  $\omega 3/\omega 6$  and EPA/AA ratios in SD and ED *Acipenser naccarii*

|                     | Liver      |             | Muscle       |               |
|---------------------|------------|-------------|--------------|---------------|
|                     | SD         | ED          | SD           | ED            |
| $\omega 3$          | 1.52±0.14  | 8.66±0.20*  | 1.18±0.06    | 2.18±0.11*    |
| $\omega 6$          | 0.75±0.06  | 2.08±0.16*  | 0.40±0.03    | 0.56±0.04     |
| $\omega 3/\omega 6$ | 1.98±0.07  | 4.16±0.08*  | 3.12±0.13    | 3.86±0.08*    |
| EPA/AA              | 2.72±0.10  | 6.28±0.38*  | 7.39±0.30    | 9.34±0.39*    |
| Vitamin E           | 0.17±0.004 | 0.13±0.001* | 0.009±0.0003 | 0.013±0.0001* |

Values are mean±s.e. ( $N=5$ ).

EPA, eicosapentaenoic acid; AA, arachidonic acid; SD, standard diet; ED, experimental diet; \* significantly different from SD value ( $P < 0.05$ ).

Table 3. *The effects of acute hypoxic exposure on mean  $\dot{V}_{O_2}$ ,  $f_G$ ,  $pHa$ ,  $Ca_{O_2}$ , noradrenaline and adrenaline, and of progressive hypoxia on plasma lactate, in SD and ED *Acipenser naccarii**

|                                                                       | SD         |            | ED         |             |
|-----------------------------------------------------------------------|------------|------------|------------|-------------|
|                                                                       | Normoxia   | Hypoxia    | Normoxia   | Hypoxia     |
| $\dot{V}_{O_2}$ (mg O <sub>2</sub> kg <sup>-1</sup> h <sup>-1</sup> ) | 151.8±21.4 | 139.4±4.8  | 141.7±19.1 | 128.5±11.5  |
| $f_G$ (beats min <sup>-1</sup> )                                      | 98.2±6.9   | 137.0±2.8* | 99.0±11.7  | 143.0±4.45* |
| $pHa$                                                                 | 7.75±0.01  | 7.77±0.02  | 7.76±0.02  | 7.72±0.02   |
| $Ca_{O_2}$ (vol%)                                                     | 7.70±0.56  | 2.79±0.43* | 7.69±0.64  | 5.25±0.62*† |
| NA (nmol l <sup>-1</sup> )                                            | 4.3±0.6    | 45.1±8.6*  | 3.7±1.1    | 54.1±19.2*  |
| A (nmol l <sup>-1</sup> )                                             | 5.2±1.6    | 29.9±6.8*  | 5.7±1.7    | 60.2±17.3*  |
| Lactate (mmol l <sup>-1</sup> )                                       | 0.30±0.19  | 3.65±0.76* | 1.18±0.81† | 2.52±0.44*  |
| $\Delta$ [Lactate] (mmol l <sup>-1</sup> )                            | —          | 3.67±1.56  | —          | 1.37±0.74†  |

Values are mean±s.e.

For SD animals,  $N=9$  for  $\dot{V}_{O_2}$ ,  $pHa$  and  $Ca_{O_2}$ ,  $N=6$  for  $f_G$ ,  $N=7$  for NA and A and  $N=6$  for lactate measurements. For ED animals,  $N=6$  in all cases.

SD, standard diet; ED, experimental diet; NA, noradrenaline; A, adrenaline;  $\Delta$ [Lactate], increase in plasma lactate concentration during progressive hypoxia; \*significantly different from normoxic value ( $P<0.05$ ); †significantly different from value in SD sturgeon ( $P<0.05$ ).

in liver and muscle of ED sturgeon, the differences being particularly marked in the liver (Table 2). Vitamin E levels were significantly elevated in muscle of ED sturgeon when compared with SD fish, but were significantly lower in the liver of ED fishes (Table 2). These differences in tissue composition were still present in SD and ED sturgeon following 1 year on the diets (E. Agradi, G. Abrami, G. Serrini, D. McKenzie, L. Bolis and P. Bronzi, in preparation) and are, therefore, representative of the tissue composition of those animals exposed to hypoxia in this study.

Under normoxic conditions, the values for  $\dot{V}_{O_2}$ ,  $f_G$ ,  $pHa$ ,  $Ca_{O_2}$ , noradrenaline and adrenaline in the SD and ED animals did not differ (Table 3). Acute hypoxic exposure had no effect on  $\dot{V}_{O_2}$  or  $pHa$  in either dietary group but gill ventilation frequency increased significantly and there was a significant decrease in  $Ca_{O_2}$ . ED sturgeon, however, maintained  $Ca_{O_2}$  at levels significantly higher than those measured in SD animals during acute hypoxic exposure (Table 3). Under normoxic conditions, plasma catecholamine levels in both dietary groups were similar to those of teleosts (Perry *et al.* 1989); both SD and ED fish showed a similar and statistically significant increase in plasma noradrenaline and adrenaline concentrations during hypoxic exposure (Table 3).

There were marked differences in the responses to progressive hypoxia between SD and ED sturgeon. SD sturgeon became extremely agitated during exposure to progressive hypoxia, whereas ED sturgeon did not. During progressive hypoxic exposure,  $\dot{V}_{O_2}$  was significantly elevated at  $Pw_{O_2}$  values between 15.7 and 7.2 kPa in SD animals (Fig. 1). Below a  $Pw_{O_2}$  of 10.8 kPa,  $\dot{V}_{O_2}$  began to decline in SD

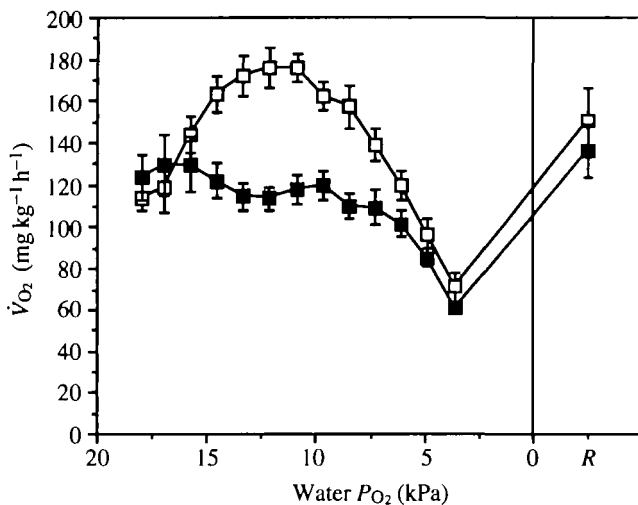

Fig. 1. The effects of progressive hypoxia on the mean ( $\pm$ s.e.) rate of oxygen uptake ( $\dot{V}_{O_2}$ ) in ED (filled symbols) and SD (open symbols) *Acipenser naccarii*.  $N=6$  for ED and 9 for SD fish. R, recovery; SD, standard diet; ED, experimental diet.

sturgeon and at 3.6 kPa  $P_{wO_2}$ ,  $\dot{V}_{O_2}$  was significantly decreased when compared with normoxia. Following 10 min of recovery in normoxic water,  $\dot{V}_{O_2}$  increased significantly when compared with that at 3.6 kPa  $P_{wO_2}$ , to a value not significantly different from that in pre-hypoxic exposure (Fig. 1). Animals given the experimental diet maintained  $\dot{V}_{O_2}$  statistically unchanged down to a  $P_{wO_2}$  of 4.8 kPa during progressive hypoxic exposure and, between 14.5 and 7.2 kPa  $P_{wO_2}$ ,  $\dot{V}_{O_2}$  in ED sturgeon was significantly lower than that of SD fish. At  $P_{wO_2}$  below 4.8 kPa,  $\dot{V}_{O_2}$  was significantly reduced compared with control values (Fig. 1). Following 10 min of recovery in normoxia, ED animals showed a significant increase in  $\dot{V}_{O_2}$  compared with that at 3.6 kPa  $P_{wO_2}$ . Oxygen consumption by ED sturgeon during recovery did not differ from that seen in SD fish during recovery (Fig. 1).

Progressive hypoxia led to a significant increase in  $f\dot{g}$  in both dietary groups (Fig. 2). In SD sturgeon,  $f\dot{g}$  was significantly increased at a  $P_{wO_2}$  of 13.3 kPa, and reached a maximum increase of 57% above normoxic values at a  $P_{wO_2}$  of 8.5 kPa. At 3.6 kPa, SD sturgeon showed a significant decrease in  $f\dot{g}$  when compared with  $f\dot{g}$  at 6.0 kPa. Following 10 min of recovery in normoxic water, ventilation was significantly elevated when compared with either pre-hypoxic exposure values or those seen at 3.6 kPa  $P_{wO_2}$  (Fig. 2). In ED sturgeon, there was no significant increase in  $f\dot{g}$  during progressive hypoxic exposure until 10.8 kPa  $P_{wO_2}$  and, at 13.3 kPa  $P_{wO_2}$ , ED sturgeon had a significantly lower  $f\dot{g}$  than SD animals. The maximum increase in  $f\dot{g}$  was also 57% above normoxic values at a  $P_{wO_2}$  of 6.0 kPa. The hyperventilation was maintained down to the lowest level of  $P_{wO_2}$ , so that at 3.6 kPa  $P_{wO_2}$  ED sturgeon had a significantly higher  $f\dot{g}$  than did SD animals (Fig. 2). Following 10 min of recovery in normoxia, ED fish showed a hyperventilation that was no different from that seen in SD sturgeon (Fig. 2).

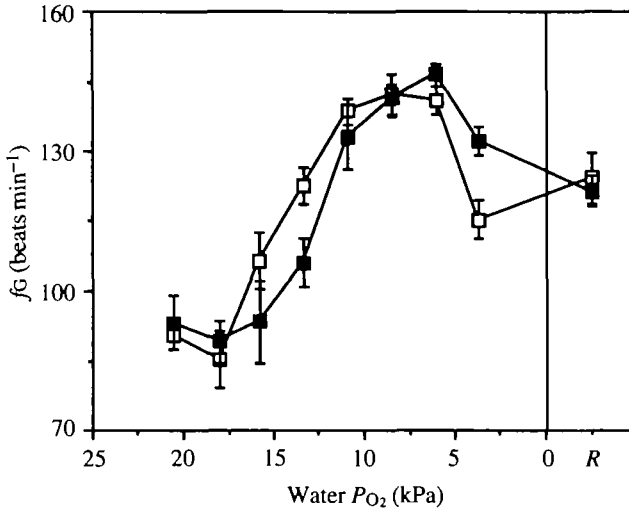

Fig. 2. The effects of progressive hypoxia on mean ( $\pm$ s.e.) gill ventilation frequency ( $f_G$ ) in ED (filled symbols) and SD (open symbols) *Acipenser naccarii*.  $N=6$  for ED and SD fish. R, recovery; SD, standard diet; ED, experimental diet.

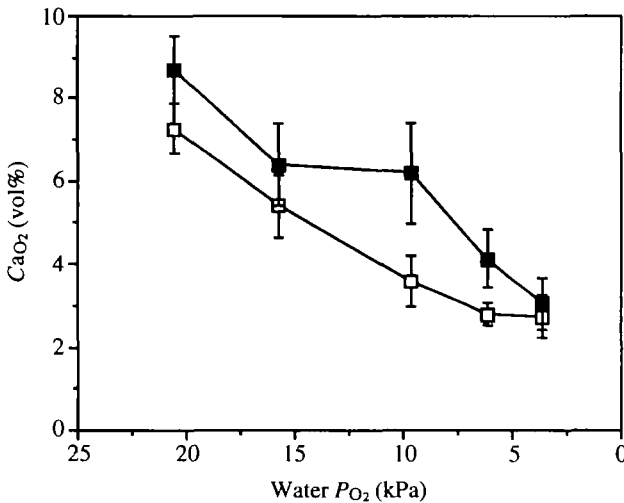

Fig. 3. The effects of progressive hypoxia on mean ( $\pm$ s.e.) arterial blood oxygen content ( $Ca_{O_2}$ ) in ED (filled symbols) and SD (open symbols) *Acipenser naccarii*.  $N=6$  for ED and SD fish. SD, standard diet; ED, experimental diet.

In both SD and ED fish,  $Ca_{O_2}$  showed a progressive reduction as  $P_{W_{O_2}}$  decreased during progressive hypoxic exposure (Fig. 3). In SD sturgeon, however,  $Ca_{O_2}$  was significantly reduced below 9.7 kPa  $P_{W_{O_2}}$ , whereas ED sturgeon did not exhibit a significant hypoxaemia until 6.0 kPa  $P_{W_{O_2}}$  (Fig. 3).

Temperature-corrected arterial plasma pH also decreased significantly as  $P_{W_{O_2}}$



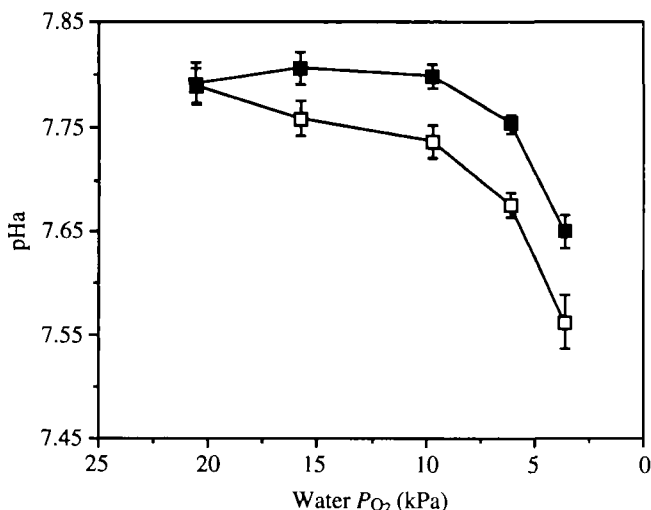

Fig. 4. The effects of progressive hypoxia on mean ( $\pm$ s.e.) arterial plasma pH (pHa) in ED (filled symbols) and SD (open symbols) *Acipenser naccarii*.  $N=6$  for ED and SD fish. SD, standard diet; ED, experimental diet.

declined in both SD and ED animals (Fig. 4). In SD sturgeon, pHa was significantly reduced compared with normoxic values at 6.0 kPa  $P_{wO_2}$  and below. ED fish did not exhibit a significant decrease in pHa until a  $P_{wO_2}$  of 3.6 kPa. At 9.7 and 6.0 kPa  $P_{wO_2}$ , the pHa values for ED animals were significantly higher than those of SD fish (Fig. 4). The acidosis was partially metabolic in origin, as both groups of sturgeon showed a significant increase in plasma lactate concentration following progressive hypoxic exposure (Table 3). Animals fed the experimental diet, however, had higher lactate levels in normoxia than did SD sturgeon and showed a significantly smaller increase in plasma lactate concentration during hypoxic exposure than did the SD animals (Table 3).

During exposure to progressive hypoxia, an accumulation of metabolic  $CO_2$  within the respirometer would have created some degree of hypercapnia. It is likely that this contributed to the responses observed and it may have contributed a respiratory component to the plasma acidosis measured in both dietary groups.

### Discussion

The results indicate that diet is a factor involved in the control of  $\dot{V}_{O_2}$  during hypoxic stress. The sturgeon in the two dietary groups were of the same genetic stock, of the same age and mass and were maintained in the same environment, suggesting that physiological disparities during hypoxic exposure can be attributed to the differences in  $\omega 3$  PUFA and vitamin E status, as indicated by tissue levels of PUFA and vitamin E (Maxwell and Marmer, 1983; Chow, 1985).

In normoxic conditions, there were no significant differences in  $Ca_{O_2}$  and pHa

measured in ED fish when compared with SD fish, indicating that the disparities in these variables between the dietary groups during hypoxia cannot be ascribed to differences under resting conditions. The differences in  $Ca_{O_2}$  during hypoxia may have been the result of differences in blood haemoglobin concentrations or blood  $O_2$ -affinity between the two groups and/or differences in cardiovascular function similar to those reported to occur in mammals (Hornstra, 1989; Budowski and Sklan, 1989; Downey, 1990). During progressive hypoxia, it is also possible, however, that differences in  $Ca_{O_2}$  and pHa may have been secondary to disparities in metabolic energy requirements between SD and ED sturgeon, as indicated by the increased  $\dot{V}_{O_2}$  and larger accumulation of lactate in the plasma of the former. A higher tissue energy requirement in SD fish might have led to an increase in  $O_2$  removal from the blood causing a greater reduction in  $Ca_{O_2}$ . An increased  $\dot{V}_{O_2}$  in the SD fish would also lead to the production and accumulation within the respirometer of more  $CO_2$  which, in concert with the larger increase in plasma lactate concentration seen in these animals, would lead to a greater reduction in pHa than that seen in ED sturgeon. In addition, the more severe acidosis might also cause further reductions in  $Ca_{O_2}$  as a result of Bohr and Root effects.

The higher  $\dot{V}_{O_2}$  in the SD sturgeon may have been the result of the agitation observed in that dietary group during progressive hypoxia. During acute hypoxic exposure, there were no significant differences in  $\dot{V}_{O_2}$  between the dietary groups, although ED fish showed a slightly reduced  $\dot{V}_{O_2}$  and a slightly larger increase in  $f_{\dot{g}}$  than did SD fish (Table 3). This indicates that the differences in  $\dot{V}_{O_2}$  during progressive hypoxia may be related either to the pattern of hypoxic exposure or to an accumulation of metabolic  $CO_2$  in the respirometer.

Despite these differences in metabolic regulation at intermediate levels of  $O_2$  availability, the ED animals were not more resistant to hypoxia: at the end of the progressive hypoxic exposure,  $Ca_{O_2}$ , pHa and  $\dot{V}_{O_2}$  values of ED and SD sturgeon were not significantly different. In fact, ED fish exhibited a significant decrease in  $\dot{V}_{O_2}$  at a  $Pw_{O_2}$  that did not cause a significant decrease in SD animals. Thus, an increase in tissue  $\omega_3$  fatty acid and vitamin E levels does not increase overall resistance to progressive hypoxia, but only alters the characteristics of the hypoxic response.

It is not known why increases in the  $\omega_3$  fatty acid and vitamin E content of the tissues of ED sturgeon lead to such differences in metabolic regulation during hypoxia. Changes in tissue  $\omega_3$  fatty acid and vitamin E content may, however, exert modulatory effects at different levels of the oxidative transformations of lipids, leading to the differences in hypoxic responses observed.

The relative tissue levels of  $\omega_3$  and  $\omega_6$  PUFA and vitamin E have been shown to modulate the biological impact of processes regulated by prostaglandins (Lands, 1986; Hornstra, 1989; Budowski and Sklan, 1989). Prostaglandins are oxygenated metabolites of PUFA found in a very broad range of organisms including plants, prokaryotes, invertebrates and vertebrates (Christ and Van Dorp, 1972). We found significant differences in the  $\omega_3/\omega_6$  and eicosapentaenoic acid/arachidonic acid ratios and vitamin E content of tissues from SD and ED sturgeon. Differences

in prostaglandin formation between SD and ED sturgeon may, thus, be one explanation for the differences in metabolic regulation observed during hypoxia. Furthermore, supplementing the diet with fish oil could affect O<sub>2</sub>-dependent lipid catabolism, leading to changes in the relative activities of mitochondrial and peroxisomal pathways (Moyes *et al.* 1990).

The ability of vitamin E to inhibit peroxidative reactions of PUFA and to scavenge free radicals is known to reduce the oxidative stress caused by hypoxia in animal tissues (Budowski and Sklan, 1989; Park *et al.* 1991; Dhaliwal *et al.* 1991). Oxidative stress caused by progressive hypoxic exposure may have contributed to the agitation seen in the SD sturgeon, leading to an increase in  $\dot{V}_{O_2}$ , an effect that was inhibited in ED fish by the higher levels of vitamin E in their tissues. It is also possible, however, that the agitation was caused by the more profound hypoxaemia and acidosis measured in SD sturgeon when compared with ED fish.

*A. naccarii* fed both fish oil and vitamin E supplements showed better growth than those fed fish oil supplements alone (E. Agradi, G. Abrami, G. Serrini, D. McKenzie, L. Bolis, and P. Bronzi, in preparation), giving indirect evidence for a combined beneficial effect of  $\omega_3$  PUFA and vitamin E.

It has been shown that enrichment of the diet with  $\omega_3$  PUFA and vitamin E protects against cardiovascular disease and against acute cardiac and cerebral ischaemia in mammals (Vergroesen, 1989; Hornstra, 1989). Our data indicate that a reduced O<sub>2</sub> requirement of tissues during hypoxia in animals with increased tissue  $\omega_3$  and vitamin E levels may contribute to the protective role of  $\omega_3$  PUFA and antioxidants in mammalian cardiac and cerebral ischaemia.

It is of interest that *A. naccarii* did not show the reduction in metabolic rate during acute hypoxic exposure that has previously been observed in the related species *A. transmontanus* at 15°C (Burggren and Randall, 1978). Acclimation of SD *A. naccarii* to 15°C had no effect on the response to acute hypoxia (D. J. Randall and D. J. McKenzie, unpublished observations), and the short duration of the acute hypoxia trial in this study precludes the possibility that an accumulation of metabolic CO<sub>2</sub> within the respirometer could have compromised a metabolic depression. Thus, the disparities in the responses may be a result of species differences but, given the differences between SD and ED *A. naccarii* in metabolic regulation during hypoxia, it is tempting to speculate that disparities between *A. naccarii* and *A. transmontanus* (Burggren and Randall, 1978) may be at least partially a result of differences in nutritional status.

In conclusion, dietary and tissue  $\omega_3$  fatty acid and vitamin E levels are clearly important variables in regulating metabolism during hypoxia in fish, and consideration of these factors may explain the variability in hypoxic responses measured by different investigators. Evaluation of physiological variables in conjunction with analysis of diet and tissue composition will increase our understanding of the impact of nutrients on whole-animal responses to environmental and pathological stresses.

The authors would like to Mr P. Romano for technical assistance, and ENEL-

CRTN for the use of the facilities at *La Casella* experimental thermal aquaculture plant. D.J.R. was supported by a NATO Senior Research Fellowship.

### References

- ACKMAN, R. G. (1980). Fish lipids. In *Advances in Fish Science and Technology* (ed. J. J. Connell), pp. 86–103. Farnham: Fishing News Books.
- BELL, M. V., HENDERSON, R. J. AND SARGENT, J. R. (1986). The role of polyunsaturated fatty acids in fish. *Comp. Biochem. Physiol.* **83B**, 711–719.
- BONDIOLOTTI, G. P., GALVA, M. D. AND PICOTTI, G. B. (1987). Simultaneous determination of catecholamines, L-DOPA and DOPAC in human plasma by high-performance liquid chromatography with electrochemical detection. *VI International Catecholamine Symposium, Jerusalem*. p117 (abstract).
- BUDOWSKI, P. AND SKLAN, D. (1989). Vitamins E and A. In *The Role of Fats in Human Nutrition*, 2nd edn (ed. A. J. Vergroesen and M. Crawford), pp. 363–406. London: Academic Press.
- BURGGREN, W. W. AND RANDALL, D. J. (1978). Oxygen uptake and transport during hypoxic exposure in the sturgeon (*Acipenser transmontanus*). *Respir. Physiol.* **34**, 171–183.
- CHOW, C. K. (1985). Vitamin E and blood. *Wld. Rev. Nutr. Diet* **45**, 133–166.
- CHRIST, E. J. AND VAN DORP, D. A. (1972). Comparative aspects of prostaglandin biosynthesis in animal tissues. *Biochim. biophys. Acta* **270**, 537–545.
- COWEY, C. B. (1986). The role of nutritional factors in the prevention of peroxidative damage to tissues. *Fish. Physiol. Biochem.* **2**, 171–178.
- CRARY, E. J. AND MCCARTY, M. F. (1984). Potential clinical applications for high-dose nutritional antioxidants. *Med. Hyp.* **13**, 77–98.
- DHALIWAL, H., KIRSHENBAUM, A., RANDHAWA, A. K. AND SINGAL, P. K. (1991). Correlation between antioxidant changes during hypoxia and recovery on reoxygenation. *Am. J. Physiol.* **261**, H632–H638.
- DOWNEY, J. M. (1990). Free radicals and their involvement during long-term myocardial ischemia and reperfusion. *A. Rev. Physiol.* **52**, 487–504.
- FOLCH, J., LEES, M. AND SLOANE-STANLEY, G. H. (1957). A simple method for the isolation and purification of total lipids from animal tissues. *J. biol. Chem.* **226**, 497–504.
- HEISLER, N. (1984). Acid–base regulation in fishes. In *Fish Physiology*, vol. 10A (ed. W. S. Hoar and D. J. Randall), pp. 315–399. New York: Academic Press.
- HORNSTRA, G. (1989). The significance of fish and fish-oil enriched food for prevention and therapy of ischaemic cardiovascular disease. In *The Role of Fats in Human Nutrition*, 2nd edn (ed. A. J. Vergroesen and M. Crawford), pp. 151–236. London: Academic Press.
- LANDS, W. E. M. (1986). The fate of polyunsaturated fatty acids. In *Health Effects of Polyunsaturated Fatty Acids in Seafoods* (ed. A. P. Simopoulos, R. R. Kifer and R. E. Martin), pp. 33–48. Orlando: Academic Press.
- MAXWELL, R. J. AND MARMER, W. N. (1983). Systematic protocol for the accumulation of fatty acid data from multiple tissue samples: tissue handling, lipid extraction and class separation, and capillary gas chromatography analysis. *Lipids* **18**, 453–459.
- MOYES, C. D., BUCK, L. T. AND HOCHACHKA, P. W. (1990). Mitochondrial and peroxisomal fatty acid oxidation in elasmobranchs. *Am. J. Physiol.* **258**, R756–R762.
- PACKER, L. (1991). Protective role of vitamin E in biological systems. *Am. J. clin. Nutr.* **53**, S1050–S1055.
- PARK, Y., KANEKAL, S. AND KEHRER, J. P. (1991). Oxidative changes in hypoxic rat heart tissue. *Am. J. Physiol.* **260**, H1395–H1405.
- PARKE, D. V. AND IOANNIDES, C. (1981). The role of nutrition in toxicology. *A. Rev. Nutr.* **1**, 207–234.
- PERRY, S. F., KINKEAD, R., GALLAUGHER, P. AND RANDALL, D. J. (1989). Evidence that hypoxemia promotes catecholamine release during hypercapnic acidosis in rainbow trout (*Salmo gairdneri*). *Respir. Physiol.* **77**, 351–364.
- RAYNARD, R. S., MCVICAR, A. H., BELL, J. G., YOUNGSON, A., KNOX, D. AND FRASER, C. O.

- (1991). Nutritional aspects of pancreas disease of Atlantic salmon: The effects of dietary vitamin E and polyunsaturated fatty acids. *Comp. Biochem. Physiol.* **98A**, 125–131.
- SOIVIO, A., NYHOLM, K. AND WESTMAN, K. (1972). A technique for repeated sampling of the blood of individual resting fish. *J. exp. Biol.* **62**, 207–217.
- TUCKER, V. A. (1967). Method for oxygen content and dissociation curves on microliter blood samples. *J. appl. Physiol.* **23**, 410–414.
- VERGROESEN, A. J. (1989). Introduction. In *The Role of Fats in Human Nutrition*, 2nd edn (ed. A. J. Vergroesen and M. Crawford), pp. 5–44. London: Academic Press.
- VERGROESEN, A. J. AND CRAWFORD, M. (1989). *The Role of Fats in Human Nutrition* (2nd edn). London: Academic Press. 580pp.
- WEBER, J. E. (1987). Carotenoids and tocopherols of corn grain determined by HPLC. *J. Am. Oil Chem. Soc.* **64**, 1129–1134.
- WOLF, K. (1963). Physiological salinities for freshwater teleosts. *Progve Fish Cult.* **25**, 135–140.
